# Supplementary material for: 1,2-Bis(diphenylphosphino)ethane nickel(ii) O,O′-dialkyldithiophosphates as potential precursors for nickel sulfides
Source: Royal Society of Chemistry journal article supplement (doi:10.1039/c6nj03186b), 2016-12-21
Supplement: c6nj03186b1.pdf [file c6nj03186b1.pdf]

SUPPLEMENTARY INFORMATION FOR

## **1,2-bis(diphenylphosphino)ethane nickel(II) O,O'- dialkyldithiophosphates as Potential Precursors for Nickel Sulfides**

Reena Yadav,<sup>a</sup> Ashish Kumar Singh,<sup>b</sup> Yogesh Waghadkar,<sup>c,d</sup> Gabriele Kociok-Köhn,<sup>e</sup> Abhinav Kumar,<sup>\*a</sup> Ratna Chauhan,<sup>\*c</sup> Sunit Rane<sup>c</sup> and Suresh Gosavi<sup>f</sup>

SUPPLEMENTARY INFORMATION FOR

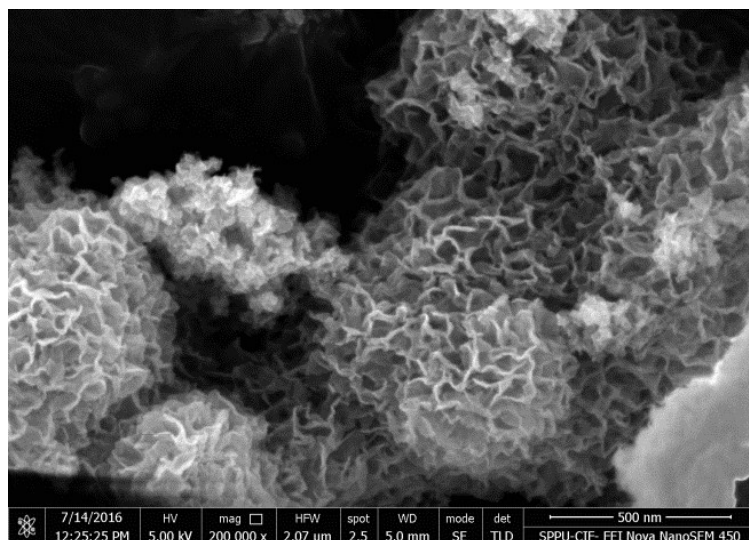

Fig. S1 SEM micrographs for the obtained nickel sulfide obtained from the precursor **1**.

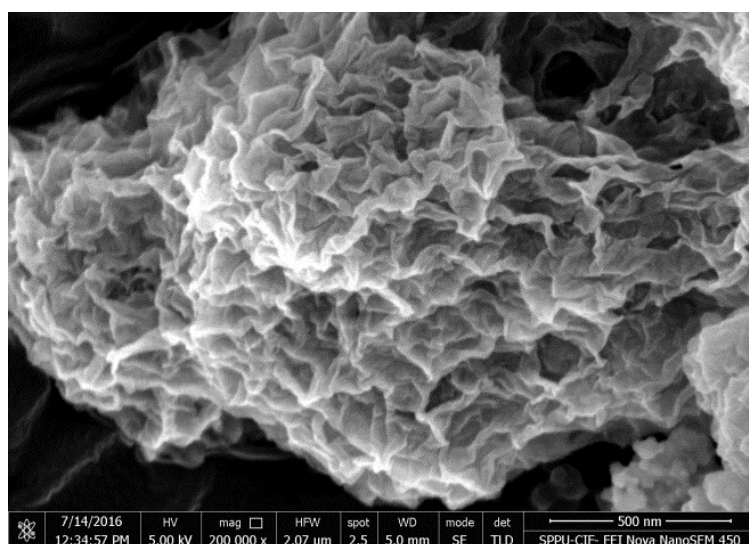

Fig. S2 SEM micrographs for the obtained nickel sulfide obtained from the precursor **2**.

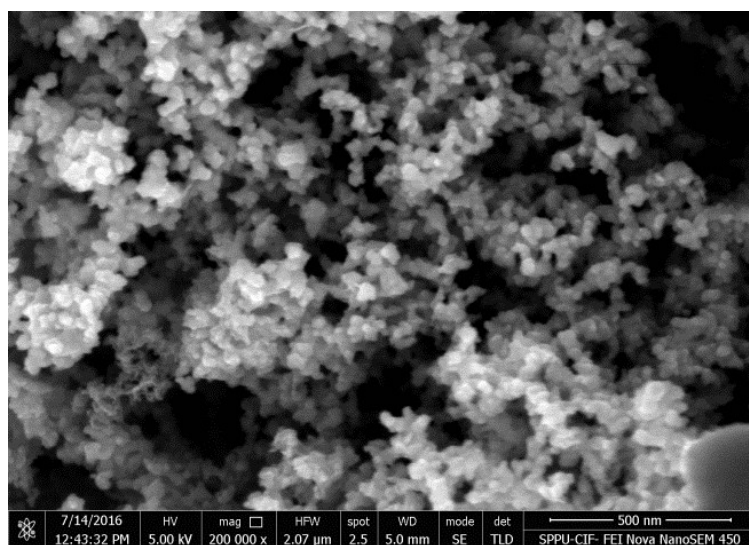

Fig. S3 SEM micrographs for the obtained nickel sulfide obtained from the precursor **3**.
